# Supplementary material for: Cytotoxic and apoptotic effects of six herbal plants against the human hepatocarcinoma (HepG2) cell line
Source: Springer Nature journal article supplement (doi:10.1186/1749-8546-6-39), 2011-10-31
Supplement: Additional file 2 [file 1749-8546-6-39-s2.doc]

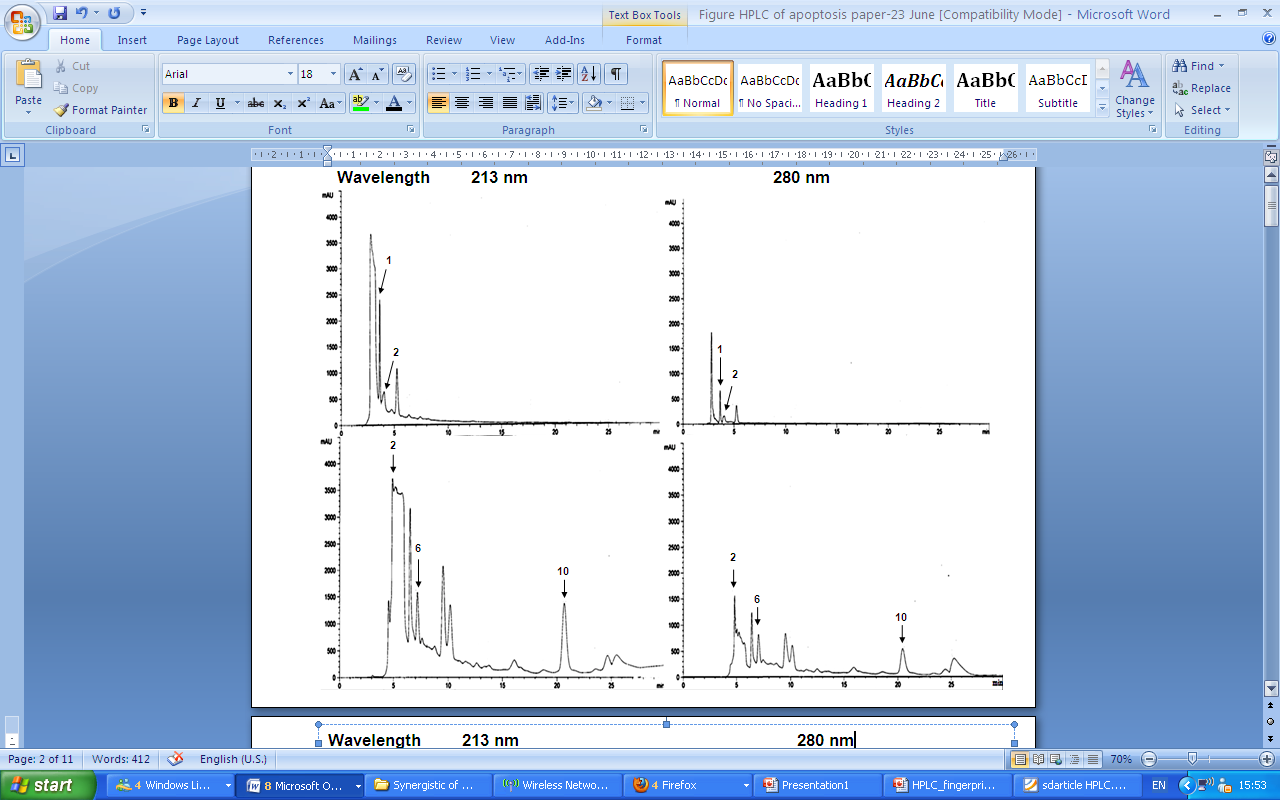

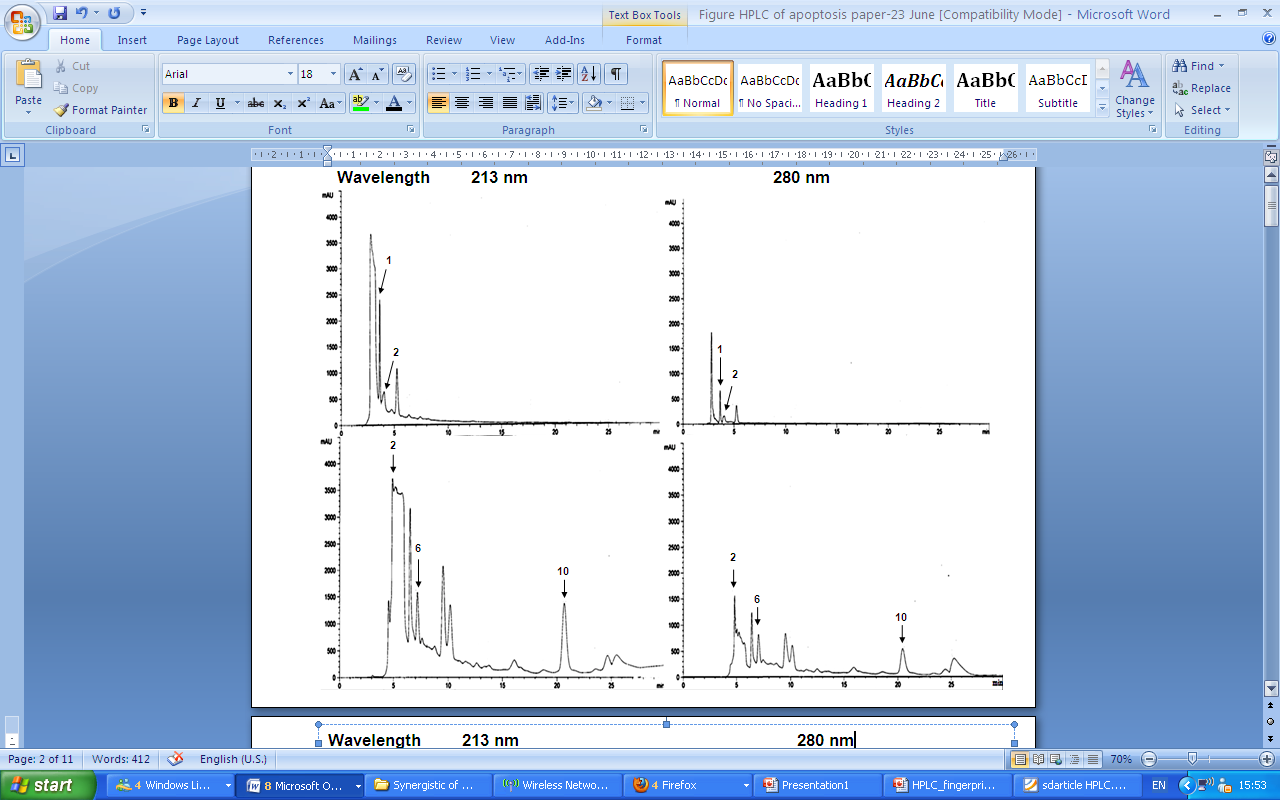


**2**

***G. daltonii***

**B**

**A**

***C. orientalis***

**Wavelength 213 nm 280 nm**


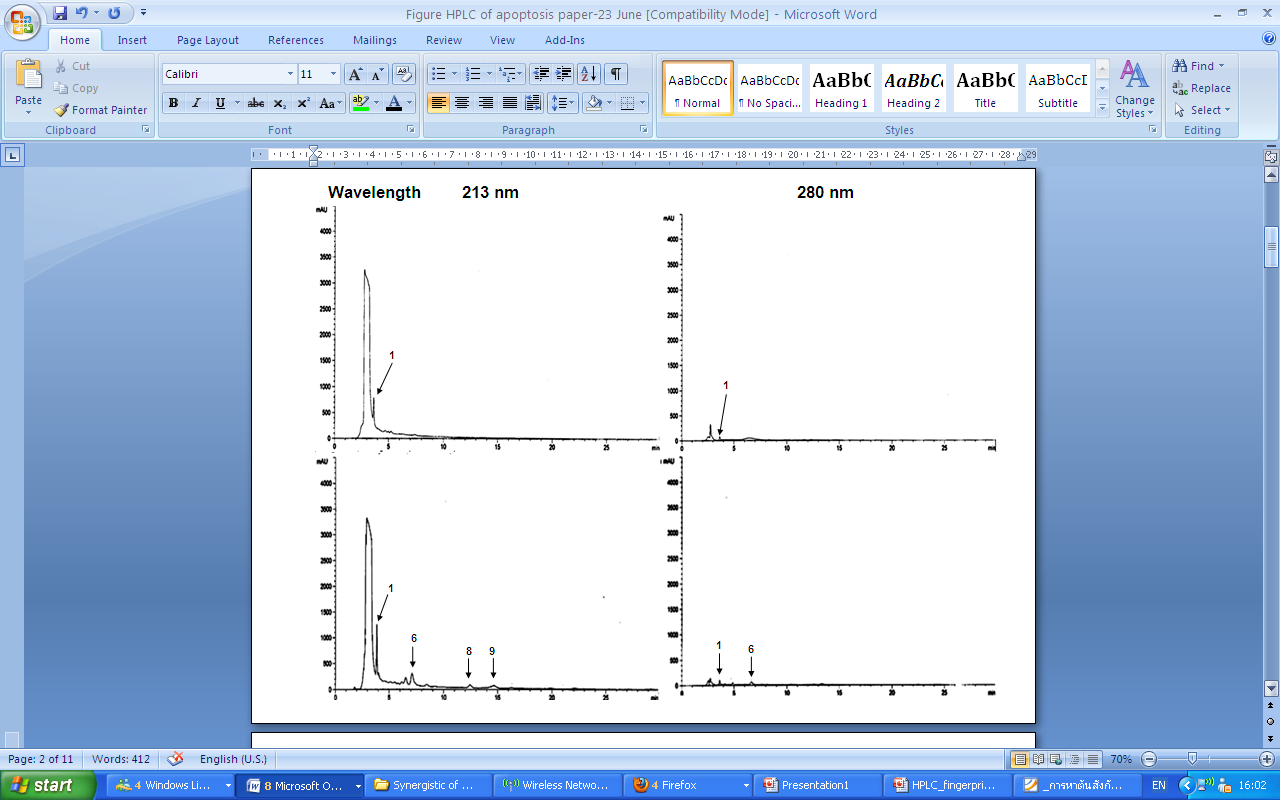

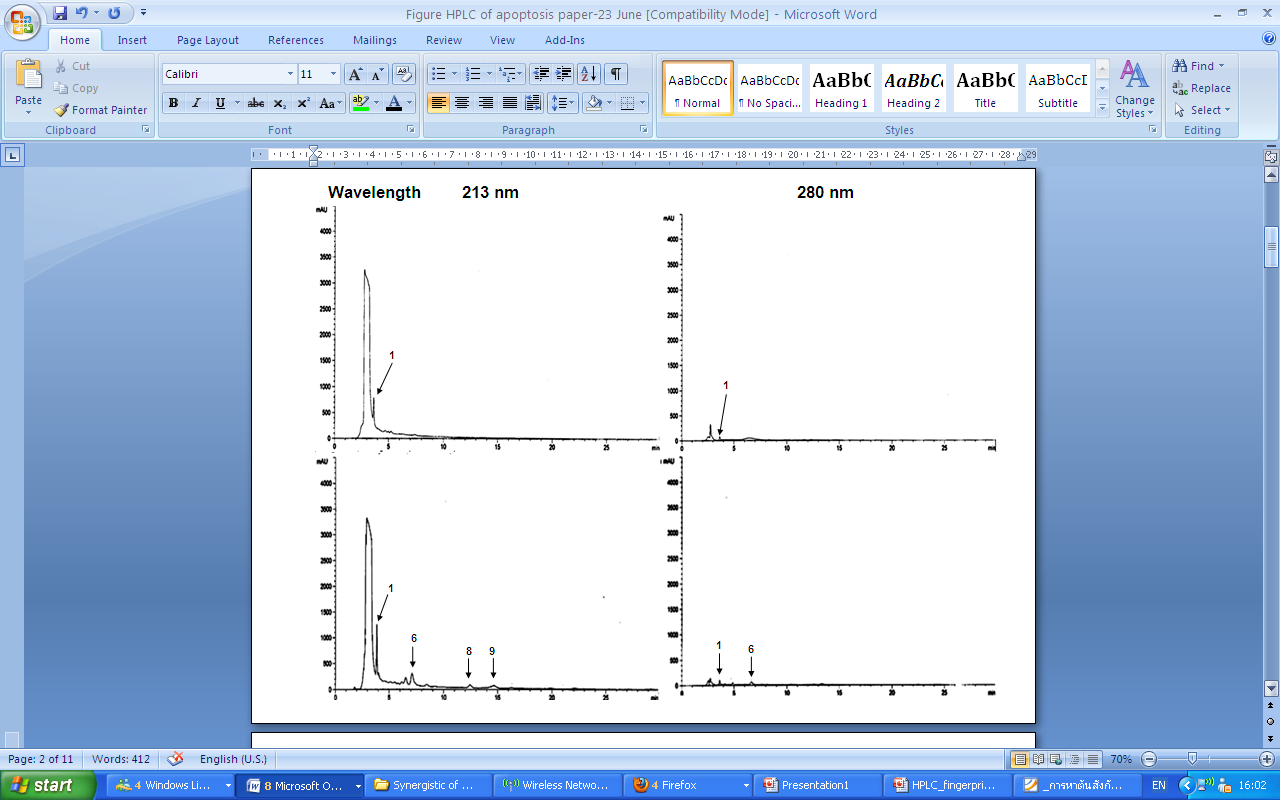


**Wavelength 213 nm 280 nm**

***C. speciosum***

***A. villosum***

**C**

**D**


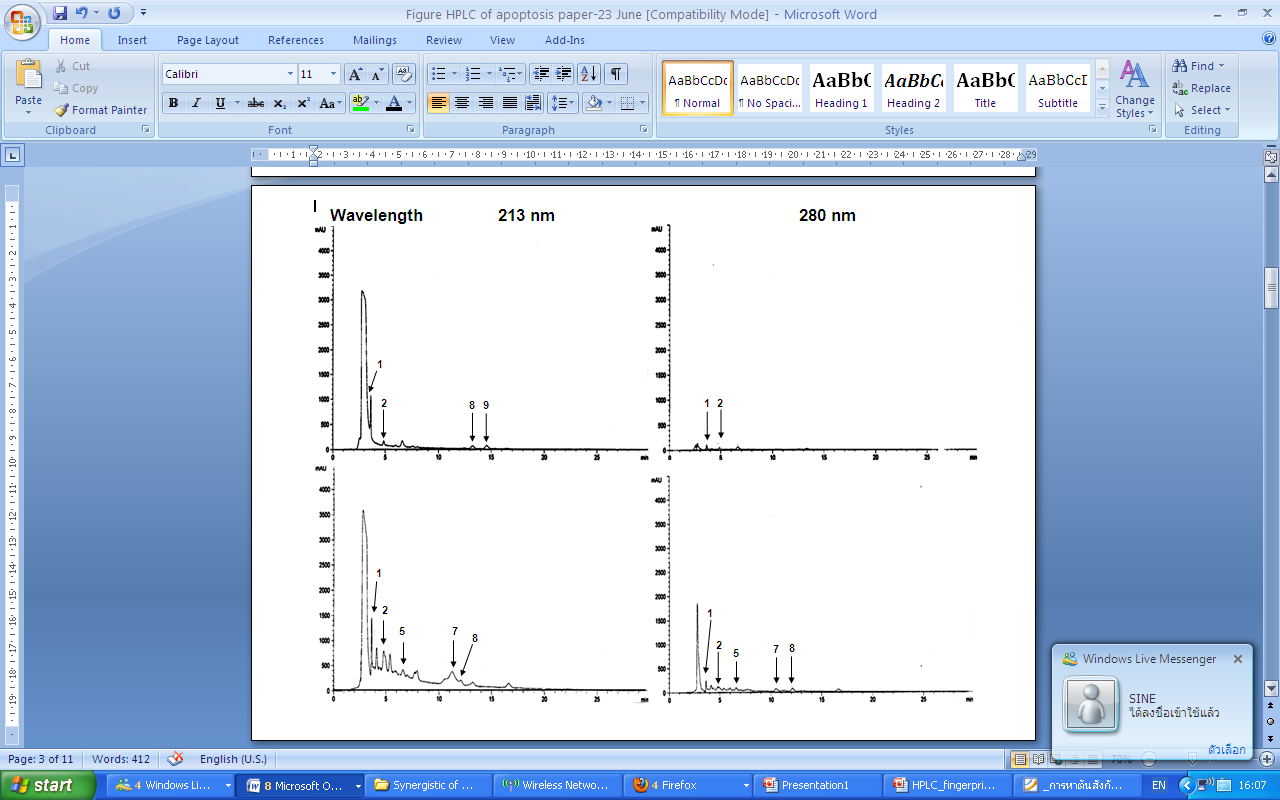

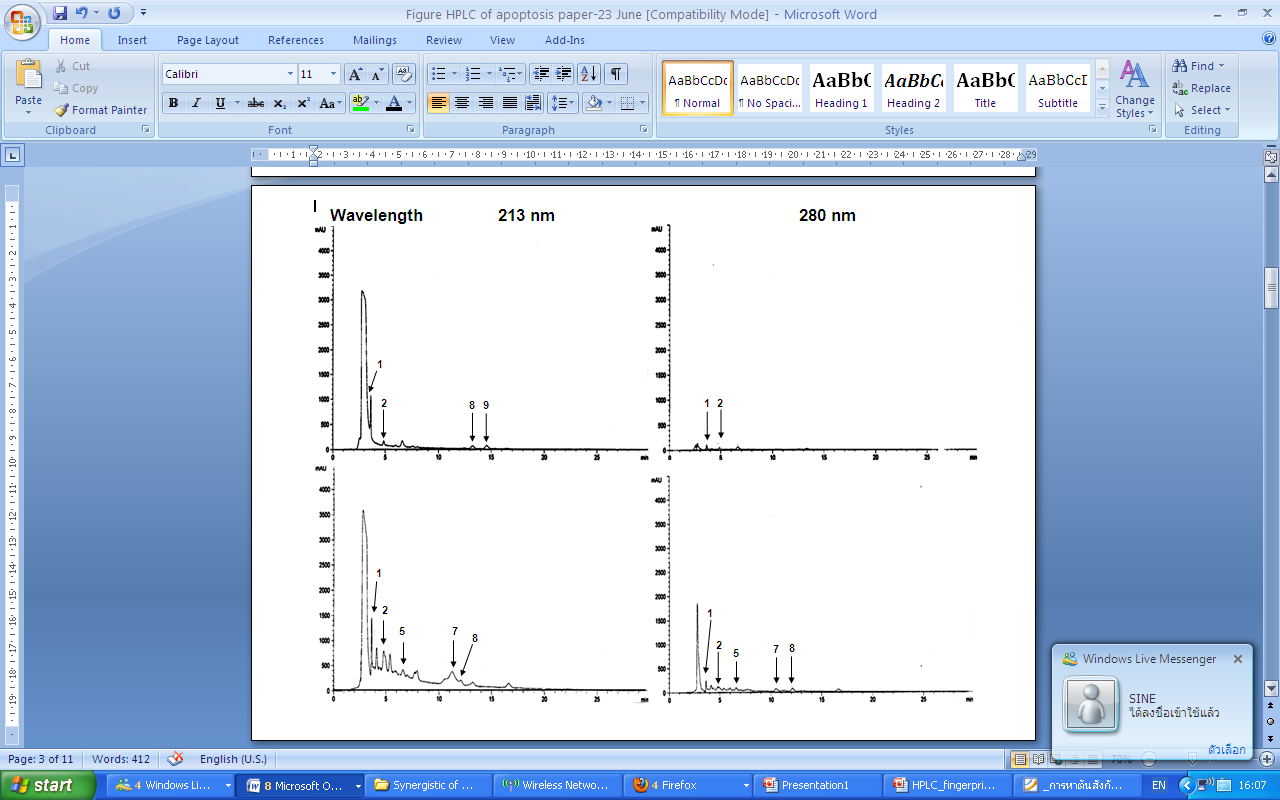


**Wavelength 213 nm 280 nm**

1. ***tatarinowii***

***P. kesiya***

**E**

**F**
